# Supplementary material for: Porous hollow manganites with robust composite shells for oxidation of CO at low temperature
Source: Royal Society of Chemistry journal article supplement (doi:10.1039/c6ra20868a), 2016-01-01
Supplement: c6ra20868a1.pdf [file c6ra20868a1.pdf]

## Supporting Information

### **Porous Hollow Manganites with Robust Composite Shells for Oxidation of CO at Low Temperature**

Jung Bo Yoo<sup>a</sup>, Sora Bang<sup>b</sup>, Kyungtae Kim<sup>b</sup>, Chengbin Li<sup>c</sup>, Ji Man Kim<sup>c</sup> and Nam Hwi Hur<sup>b\*</sup>

<sup>a</sup>Nuclear Chemistry Research Division, Korea Atomic Energy Research Institute, 111  
Daedeok-daero-989, Yuseong-gu, Daejeon, 34057 Korea

<sup>b</sup>Department of Chemistry, Sogang University, Seoul 121-742, Korea

<sup>c</sup>Department of Chemistry, Sungkyunkwan University, Suwon, 16419, Korea.

\*E-mail: [nhhur@sogang.ac.kr](mailto:nhhur@sogang.ac.kr)

## I. Experimental

### Synthesis of hollow nickel-coated silica microspheres (Ni@SiO<sub>2</sub>)

The prepared core/shell SiO<sub>2</sub> microspheres (0.495 g) were dispersed in 250 mL of deionized water in a 500 mL round-bottom flask. Nickel acetylacetonate (0.4 g, 1.6 × 10<sup>-3</sup> mol) and urea (4.0 g, 6.7 × 10<sup>-2</sup> mol) were dissolved into the solution, which was then stirred at 80 °C for 2 h. The white microspheres gradually became green colloidal spheres, which were separated from the solution by centrifugation (3000 rpm), and dried in an oven at 100 °C. The dried microspheres (Ni(OH)<sub>2</sub>@SiO<sub>2</sub>) were annealed at 750 °C for 20 h under a reducing atmosphere (Ar/H<sub>2</sub> = 95:5) to yield the desired nickel-coated microspheres (Ni@SiO<sub>2</sub>). Furthermore, the resultant green colloidal spheres were annealed in air at 700 °C for 10 h, yielding nickel oxide-coated silica microspheres, which were denoted as NiO@SiO<sub>2</sub>.

## II. Figures

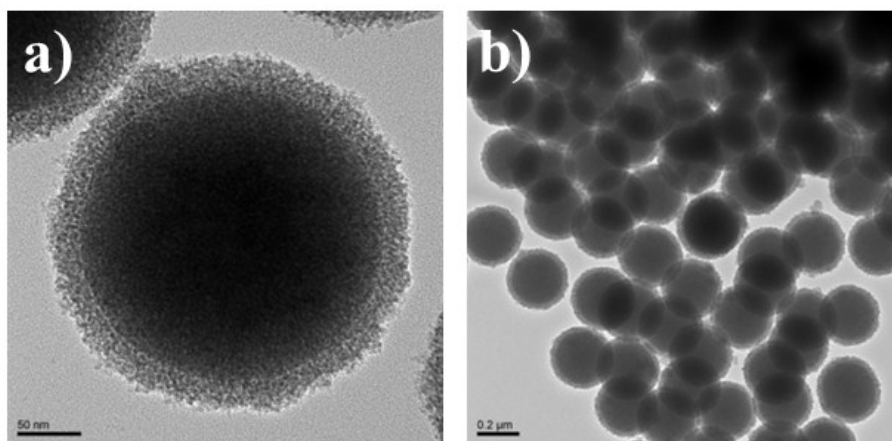

**Fig. S1** Representative TEM images of SiO<sub>2</sub> microspheres with a core/shell structure. High and low resolution images are given in a) and b), respectively. The core having a dark image had a diameter of approximately 250 nm and the shell with a bright image had a thickness of 35–45 nm. Both core and shell are composed of Si and O, which was determined by Energy-dispersive X-ray spectroscopy. Carbon residues were not detected.

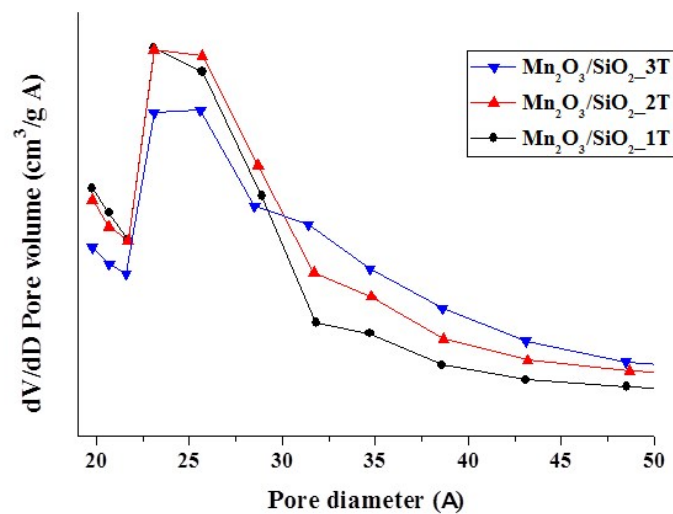

**Fig. S2** Pore-size distribution curves of  $\text{Mn}_2\text{O}_3/\text{SiO}_2_{1\text{T}}$ ,  $\text{Mn}_2\text{O}_3/\text{SiO}_2_{2\text{T}}$ , (c)  $\text{Mn}_2\text{O}_3/\text{SiO}_2_{3\text{T}}$ , in which pore-size distributions were calculated using the Barrett-Joyner-Halenda method.

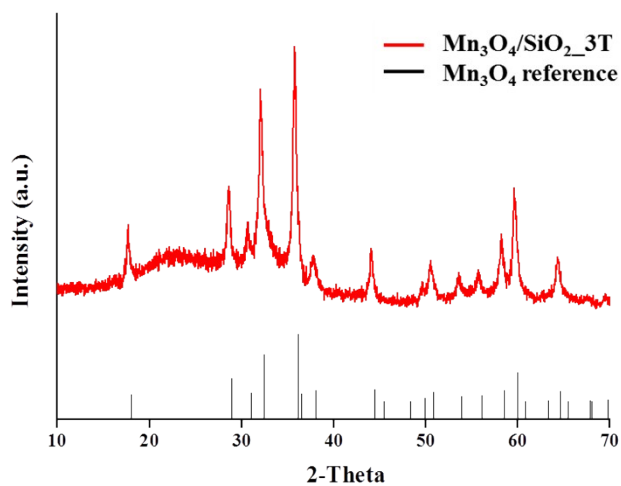

**(a)**

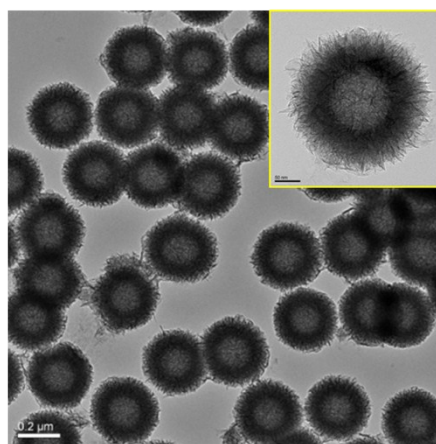

**(b)**

**Fig. S3** (a) Powder XRD pattern and (b) representative TEM image of  $\text{Mn}_3\text{O}_4/\text{SiO}_2_{3\text{T}}$  microspheres.

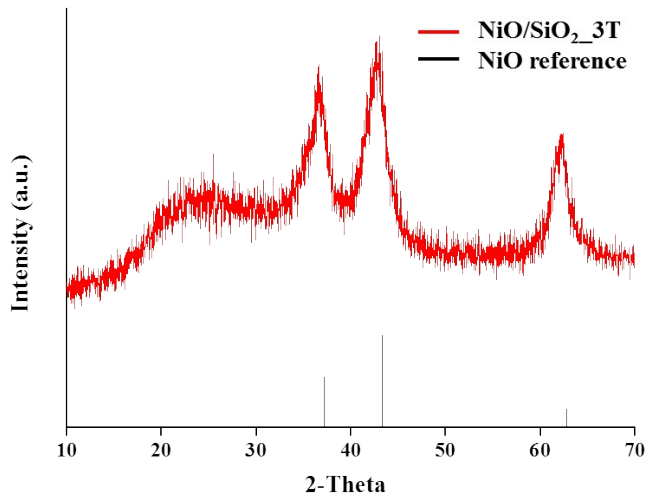

(a)

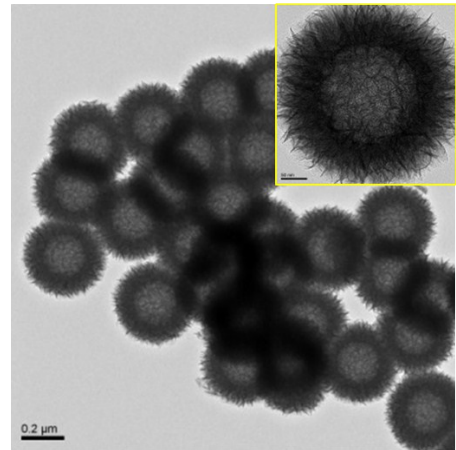

(b)

**Fig. S4** (a) Powder XRD pattern and (b) representative TEM image of NiO/SiO<sub>2</sub>\_3T microspheres.

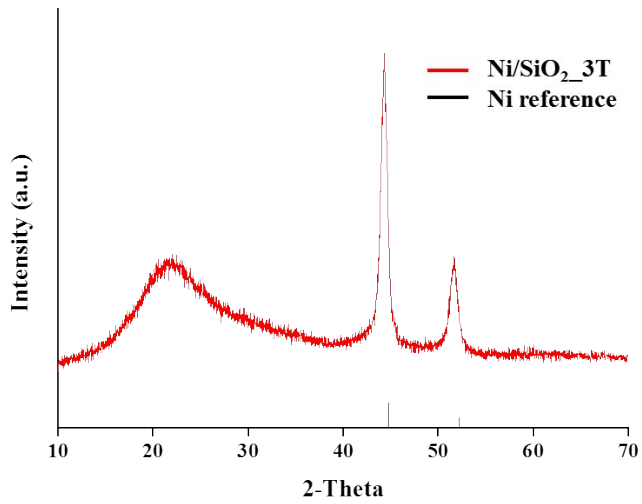

(a)

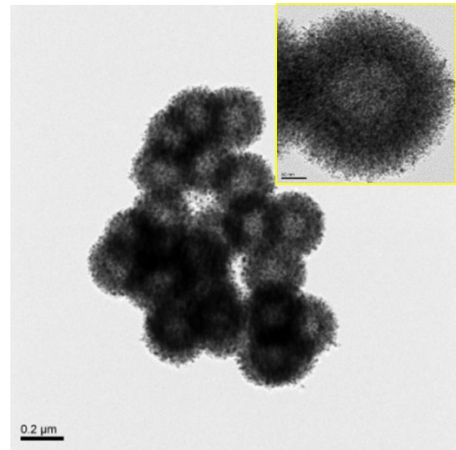

(b)

**Fig. S5** (a) Powder XRD pattern and (b) representative TEM image of Ni/SiO<sub>2</sub>\_3T microspheres.

### III. Tables

**Table S1.** Comparison of catalytic performance for CO oxidation of Mn<sub>2</sub>O<sub>3</sub>/SiO<sub>2</sub>\_3T with other Mn-based catalysts.

| No | Catalysts                                                         | S <sub>BET</sub> [m <sup>2</sup> /g] | Conditions                                                                          | T <sub>50</sub> [°C] | T <sub>100</sub> [°C] | Ref       | Remark                   |
|----|-------------------------------------------------------------------|--------------------------------------|-------------------------------------------------------------------------------------|----------------------|-----------------------|-----------|--------------------------|
| 1  | Mn <sub>2</sub> O <sub>3</sub> /SiO <sub>2</sub> _3T              | 497.11                               | 0.05 g of catalyst,<br>3.5 % CO and 8.4 % O <sub>2</sub> ,<br>50 mL/min             | 110                  | < 200                 | This work | Mn (45.48 wt%)           |
| 2  | PdO <sub>x</sub> /Mn <sub>2</sub> O <sub>3</sub>                  | 25.50                                | 1 g of catalyst,<br>2000 ppm CO in air,<br>GHSV = 12200 h <sup>-1</sup>             | 130                  | 200                   | 1         | PdO <sub>x</sub> (1 wt%) |
| 3  | Mn <sub>2</sub> O <sub>3</sub>                                    | 37.00                                | 0.05 g of catalyst,<br>1 % CO, 20 % O <sub>2</sub> ,<br>50 mL/min                   | 135                  | 400                   | 2         | Mn (53.39 wt%)           |
| 4  | Au/Mn <sub>2</sub> O <sub>3</sub>                                 | 29.00                                | 0.05 g of catalyst,<br>1 % CO, 20 % O <sub>2</sub> ,<br>50 mL/min                   | 25                   | 100                   | 2         | Au (2.9 wt%)             |
| 5  | Mn <sub>2</sub> O <sub>3</sub>                                    | 20.00                                | 1 mL of catalyst,<br>1% CO, 18 % O <sub>2</sub> ,<br>GHSV = 10000 h <sup>-1</sup>   | 150                  | 220                   | 3         | Mn (53.39 wt%)           |
| 6  | Mn <sub>2</sub> O <sub>3</sub> -Al <sub>2</sub> O <sub>3</sub>    | 127.04                               | 0.3 g of catalyst,<br>1 % CO, 18.8 % O <sub>2</sub> ,<br>100 mL/min                 | 280                  | > 300                 | 10        | -                        |
| 7  | Au/Mn <sub>2</sub> O <sub>3</sub> -Al <sub>2</sub> O <sub>3</sub> | 210.12                               | 0.3 g of catalyst,<br>1 % CO, 18.8 % O <sub>2</sub> ,<br>100 mL/min                 | 270                  | > 300                 | 10        | Au (2 wt%)               |
| 8  | α-Mn <sub>2</sub> O <sub>3</sub>                                  | 37.00                                | 0.05 g of catalyst,<br>1 % CO, 20 % O <sub>2</sub> ,<br>50 mL/min                   | 134                  | 180                   | 5         | Mn (53.39 wt%)           |
| 9  | Mn <sub>2</sub> O <sub>3</sub> /Mn <sub>3</sub> O <sub>4</sub>    | 18.00                                | 0.2 g of catalyst,<br>5 % CO, 10 % O <sub>2</sub> ,<br>GHSV = 36000 h <sup>-1</sup> | 300                  | 500                   | 6         | Mn (64.59 wt%)           |
| 10 | 3DOM Mn <sub>2</sub> O <sub>3</sub>                               | 37.70                                | 1% CO, 20 % O <sub>2</sub> ,<br>GHSV = 20000 h <sup>-1</sup>                        | 168                  | > 300                 | 7         | Mn (53.39 wt%)           |
| 11 | α-Mn <sub>2</sub> O <sub>3</sub>                                  | 27.00                                | 1 % CO, 20 % O <sub>2</sub> ,<br>GHSV = 36000 h <sup>-1</sup>                       | 155                  | 300                   | 8         | Mn (53.39 wt%)           |
| 12 | Mn <sub>2</sub> O <sub>3</sub>                                    | -                                    | 0.5 g of catalyst,<br>1:1 mixture CO+O <sub>2</sub> ,<br>30 mL/min                  | 210                  | 300                   | 9         | Mn (53.39 wt%)           |
| 13 | Mn <sub>2</sub> O <sub>3</sub> +SnO <sub>2</sub>                  | -                                    | 0.5 g of catalyst,<br>1:1 mixture CO+O <sub>2</sub> ,<br>30 mL/min                  | 120                  | > 400                 | 9         | -                        |
| 14 | γ-Mn <sub>2</sub> O <sub>3</sub>                                  | -                                    | 0.15 g of catalyst,<br>2.4 % CO, 1.2 % O <sub>2</sub> ,<br>80 mL/min                | 165                  | > 350                 | 4         | Mn (53.39 wt%)           |
| 15 | Ag/γ-Mn <sub>2</sub> O <sub>3</sub>                               | -                                    | 0.15 g of catalyst,<br>2.4 % CO, 1.2 % O <sub>2</sub> ,<br>80 mL/min                | 110                  | 200                   | 4         | Ag (20 wt%)              |
| 16 | Mn <sub>2</sub> O <sub>3</sub> /SBA-15                            | 226.00                               | 5 % CO, 5 % O <sub>2</sub> ,<br>GHSV = 6000 h <sup>-1</sup>                         | 200                  | > 250                 | 11        | -                        |
| 17 | α-Mn <sub>2</sub> O <sub>3</sub>                                  | -                                    | 1 % CO, 20 % O <sub>2</sub> ,<br>GHSV = 36000 h <sup>-1</sup>                       | 160                  | 300                   | 12        | Mn (53.39 wt%)           |
| 18 | Mn <sub>1.95</sub> Pd <sub>0.05</sub> O <sub>3</sub>              | 11.30                                | 0.9 g of catalyst,<br>5 % CO, 5 % O <sub>2</sub> ,<br>80 mL/min                     | 169                  | 190                   | 13        | Pd (3.3 wt%)             |
| 19 | Mn <sub>1.92</sub> Pd <sub>0.08</sub> O <sub>3</sub>              | 13.50                                | 0.9 g of catalyst,<br>5 % CO, 5 % O <sub>2</sub> ,<br>80 mL/min                     | 160                  | 180                   | 13        | Pd (5.3 wt%)             |

**Table S2.** Comparison of catalytic performance for CO oxidation of Mn<sub>2</sub>O<sub>3</sub>/SiO<sub>2</sub>\_3T with inexpensive catalysts on the basis of metal oxides.

| No | Catalysts                                              | Catalyst Weight (mg) | CO Concentration (%) | Flow Rate (mL/min) | T <sub>50</sub> (°C) | T <sub>100</sub> (°C) | Ref              |
|----|--------------------------------------------------------|----------------------|----------------------|--------------------|----------------------|-----------------------|------------------|
| 1  | Mn <sub>2</sub> O <sub>3</sub> /SiO <sub>2</sub> _3T   | 50                   | 3.5                  | 50.0               | 110                  | < 200                 | <b>This Work</b> |
| 2  | CuO/Ce <sub>0.8</sub> Zr <sub>0.2</sub> O <sub>2</sub> | 200                  | 10.0                 | 36.6               | -                    | 90                    | 14               |
| 3  | CuO-Fe <sub>2</sub> O <sub>3</sub>                     | 200                  | 10.0                 | 36.6               | -                    | 115                   | 15               |
| 4  | CuO/MTPs <sup>a)</sup>                                 | 200                  | 10.0                 | 36.6               | -                    | 300                   | 16               |
| 5  | CuO/Al <sub>2</sub> O <sub>3</sub>                     | 150                  | 2.0                  | 100.0              | 226                  | > 265                 | 17               |
| 6  | CuO nanorods                                           | 80                   | 15.0                 | 15.0               | 140                  | 160                   | 18               |
| 7  | CuO/ARM-20% <sup>b)</sup>                              | 200                  | 10.0                 | 50.0               | 120                  | 170                   | 19               |
| 8  | CuO/CeO <sub>2</sub>                                   | 100                  | 1.0                  | 66.7               | 100                  | 150                   | 20               |
| 9  | FeCo15 <sup>c)</sup>                                   | 200                  | 10.0                 | 36.6               | 180                  | 250                   | 21               |
| 10 | LFO-2 <sup>d)</sup>                                    | 200                  | 1.0                  | 100.0              | 170                  | 208                   | 22               |
| 11 | CuO-Ce <sub>1-x</sub> La <sub>x</sub> O <sub>2-x</sub> | 400                  | 5.4                  | 215.0              | 150                  | > 300                 | 23               |

<sup>a)</sup> MTPs: mesoporous titanium phosphonate spheres, <sup>b)</sup> ARM-20%: activated red mud, <sup>c)</sup> FeCo15: mesoporous Co-Fe-O nanocatalysts (FeCo<sub>x</sub>, x= Co/Co+Fe), <sup>d)</sup> LFO-2: LaFeO<sub>3</sub> (SiO<sub>2</sub> nanospheres as the hard template).

#### IV. References

1. J. S. Park, D. S. Doh and K. Lee, *Top. Catal.*, 2000, **10**, 127.
2. L. Wang, Q. Liu, X. Huang, Y. Liu, Y. Cao and K. Fan, *Appl. Catal. B: Environ.*, 2009, **88**, 204.
3. S. Imamura, H. Sawada, K. Uemura and S. Ishida, *J. Catal.*, 1988, **109**, 198.
4. R. Lin, W. Liu, Y. Zhong and M. Luo, *Appl. Catal. A: Gen.*, 2001, **220**, 165.
5. L. Wang, X. Huang, Q. Liu, Y. Liu, Y. Cao, H. He, K. Fan and J. Zhuang, *J. Catal.*, 2008, **259**, 66.
6. S. A. C. Carabineiro, S. S. T. Bastos, J. J. M. órfão, M. F. R. Pereira, J. J. Delgado and J. L. Figueiredo, *Catal. Lett.*, 2010, **134**, 217.
7. S. Xie, H. Dai, J. Deng, H. Yang, W. Han, H. Arandiyán and G. Guo, *J. Hazard.*

- Mater.*, 2014, **279**, 392.
8. Y. Luo, Y. Deng, W. Mao, X. Yang, K. Zhu, J. Xu and Y. Han, *J. Phys. Chem. C.*, 2012, **116**, 20975.
  9. S. K. Kulshreshtha and M. M. Gadgil, *Appl. Catal. B: Environ.*, 1997, **11**, 291.
  10. B. Malecka and M. Rajska, *Ceram. Mater.*, 2010, **62**, 540.
  11. Y. Han, F. Chen, Z. Zhong, K. Ramesh, L. Chen and E. Widjaja, *J. Phys. Chem. B.*, 2006, **110**, 24450.
  12. J. Xu, Y. Deng, Y. Luo, W. Mao, X. Yang and Y. Han, *J. Catal.*, 2013, **300**, 225.
  13. R. K. Kunkalekar and A. V. Salker, *Reac. Kinet. Mech. Cat.*, 2012, **106**, 395.
  14. J-L. Cao, Y. Wang, T-Y. Zhang, S-H Wu and Z-Y. Yuan, *Appl. Catal. B: Environ.*, 2008, **78**, 120.
  15. J-L. Cao, Y. Wang, X-L. Yu, S-R. Wang, S-H. Wu and Z-Y. Yuan, *Appl. Catal. B: Environ.*, 2008, **79**, 26.
  16. T-Y. Ma and Z-Y. Yuan, *Dalton Trans.*, 2010, **39**, 9570.
  17. Z. Boukha, J. L. Ayastuy, A. I-Gonzalez, B. P-Ayo, M. A. G-Ortiz and J. R. G-Velasco, *Appl. Catal. B: Environ.*, 2014, **160**, 629.
  18. K. Zhong, J. Xue, Y. Mao, C. Wang, T. Zhai, P. Liu, X. Xia, H. Li and Y. Tong, *RSC Advances*, 2012, **2**, 11520.
  19. Z-P. Hu, Y-P. Zhu, Z-M. Gao, G. Wang, Y. Liu, X. Liu and Z-Y. Yuan, *Chem. Eng. J.*, 2016, **302**, 23.
  20. S. Zeng, K. Liu, L. Zhang, B. Qin, T. Chen, Y. Yin and H. Su, *J. Power Sources*, 2014, 261, 46.
  21. J-L. Cao, G-J. Li, Y. Wang, G. Sun, X-D. Wang, B. Hari and Z-Y. Zhang, *J. Environ. Chem. Eng.*, 2014, **2**, 477.
  22. B. Gao, J. Deng, Y. Liu, Z. Zhao, X. Li, Y. Wang and H. Dai, *Chin. J. Catal.*, 2013, **34**, 2223.

23. J. S. Moura, J. S. L. Fonseca, N. Bion, F. Epron, T. F. Silva, C. G. Maciel, J. M. Assaf and M. C. Rangel, *Catal. Today*, 2014, **228**, 40.
